# Supplementary material
Source: publisher figshare collection journal article supplement (https://diabetesjournals.figshare.com/ndownloader/files/23911379)

**Supplemental Table S1.** Relationship between age and height, weight, BMI, and LBMI Z-scores

|                                  | b                  | SE   | P      | R <sup>2</sup> |
|----------------------------------|--------------------|------|--------|----------------|
| Height (Z-score)                 |                    |      |        | 0.037          |
| Group (vs. healthy weight)       |                    |      |        |                |
| Obese                            | 1.25               | 0.54 | 0.021  |                |
| Type 2 diabetes                  | 1.44               | 0.58 | 0.013  |                |
| Age (years)                      | -0.01              | 0.02 | 0.750  |                |
| Interaction (vs. healthy weight) |                    |      |        |                |
| Obese                            | -0.07              | 0.03 | 0.026  |                |
| Type 2 diabetes                  | -0.07              | 0.03 | 0.037  |                |
| Intercept                        | 0.26               | 0.35 | 0.472  |                |
| Weight (Z-score)                 |                    |      |        | 0.739          |
| Group (vs. healthy weight)       |                    |      |        |                |
| Obese                            | 2.20               | 0.32 | <0.001 |                |
| Type 2 diabetes                  | 3.34 <sup>a</sup>  | 0.34 | <0.001 |                |
| Age (years)                      | -0.01              | 0.01 | 0.282  |                |
| Interaction (vs. healthy weight) |                    |      |        |                |
| Obese                            | 0.00               | 0.02 | 0.907  |                |
| Type 2 diabetes                  | -0.07 <sup>b</sup> | 0.02 | <0.001 |                |
| Intercept                        | 0.32               | 0.21 | 0.127  |                |
| BMI (Z-score)                    |                    |      |        | 0.667          |
| Group (vs. healthy weight)       |                    |      |        |                |
| Obese                            | 3.27               | 0.45 | <0.001 |                |
| Type 2 diabetes                  | 4.99               | 0.49 | <0.001 |                |
| Age (years)                      | -0.02              | 0.02 | 0.235  |                |
| Interaction (vs. healthy weight) |                    |      |        |                |
| Obese                            | -0.04              | 0.02 | 0.148  |                |
| Type 2 diabetes                  | -0.14 <sup>b</sup> | 0.03 | <0.001 |                |
| Intercept                        | 0.38               | 0.30 | 0.206  |                |
| LBMI (Z-score)                   |                    |      |        | 0.681          |
| Group (vs. healthy weight)       |                    |      |        |                |
| Obese                            | 2.04               | 0.33 | <0.001 |                |
| Type 2 diabetes                  | 3.32 <sup>a</sup>  | 0.35 | <0.001 |                |
| Age (years)                      | 0.01               | 0.01 | 0.427  |                |
| Interaction (vs. healthy weight) |                    |      |        |                |
| Obese                            | 0.00               | 0.02 | 0.941  |                |
| Type 2 diabetes                  | -0.08 <sup>b</sup> | 0.02 | <0.001 |                |
| Intercept                        | -0.48              | 0.22 | 0.028  |                |

For regression analyses, the healthy weight group is used as the reference. Each model includes group and age as main effects and a group by age interaction term to assess whether group differences vary by age.

<sup>a</sup>Significant difference ( $P < 0.05$ ) in group main effect between obese and type 2 diabetes groups for respective outcome

<sup>b</sup>Significant difference ( $P < 0.05$ ) in interaction effect between obese and type 2 diabetes groups for respective outcome

**Supplemental Table S2.** Relationship between age and bone Z-scores

|                                  | b                  | SE   | P      | R <sup>2</sup> |
|----------------------------------|--------------------|------|--------|----------------|
| BMC (Z-score)                    |                    |      |        | 0.240          |
| Group (vs. healthy weight)       |                    |      |        |                |
| Obese                            | 1.52               | 0.42 | <0.001 |                |
| Type 2 diabetes                  | 2.49 <sup>a</sup>  | 0.45 | <0.001 |                |
| Age (years)                      | 0.01               | 0.02 | 0.546  |                |
| Interaction (vs. healthy weight) |                    |      |        |                |
| Obese                            | -0.03              | 0.02 | 0.164  |                |
| Type 2 diabetes                  | -0.09 <sup>b</sup> | 0.02 | <0.001 |                |
| Intercept                        | -0.01              | 0.27 | 0.982  |                |
| aBMD (Z-score)                   |                    |      |        | 0.052          |
| Group (vs. healthy weight)       |                    |      |        |                |
| Obese                            | 0.46               | 0.47 | 0.329  |                |
| Type 2 diabetes                  | 1.63 <sup>a</sup>  | 0.51 | 0.001  |                |
| Age (years)                      | 0.02               | 0.02 | 0.378  |                |
| Interaction (vs. healthy weight) |                    |      |        |                |
| Obese                            | 0.00               | 0.03 | 0.888  |                |
| Type 2 diabetes                  | -0.07 <sup>b</sup> | 0.03 | 0.016  |                |
| Intercept                        | 0.20               | 0.31 | 0.513  |                |

For regression analyses, the healthy weight group is used as the reference. Each model includes group and age as main effects and a group by age interaction term to assess whether group differences vary by age.

<sup>a</sup>Significant difference (P<0.05) in group main effect between obese and type 2 diabetes groups for respective outcome

<sup>b</sup>Significant difference (P<0.05) in interaction effect between obese and type 2 diabetes groups for respective outcome

**Supplemental Table S3.** Relationship between LBMI Z-scores and bone Z-scores

|                                  | b     | SE   | P      | R <sup>2</sup> |
|----------------------------------|-------|------|--------|----------------|
| BMC (Z-score)                    |       |      |        | 0.422          |
| Group (vs. healthy weight)       |       |      |        |                |
| Obese                            | -0.34 | 0.16 | 0.033  |                |
| Type 2 diabetes                  | -0.33 | 0.13 | 0.009  |                |
| LBMI (Z-score)                   | 0.68  | 0.08 | <0.001 |                |
| Interaction (vs. healthy weight) |       |      |        |                |
| Obese                            | -0.05 | 0.11 | 0.638  |                |
| Type 2 diabetes                  | -0.05 | 0.10 | 0.598  |                |
| Intercept                        | 0.37  | 0.05 | <0.001 |                |
| aBMD (Z-score)                   |       |      |        | 0.174          |
| Group (vs. healthy weight)       |       |      |        |                |
| Obese                            | -0.70 | 0.19 | <0.001 |                |
| Type 2 diabetes                  | -0.44 | 0.15 | 0.005  |                |
| LBMI (Z-score)                   | 0.64  | 0.09 | <0.001 |                |
| Interaction (vs. healthy weight) |       |      |        |                |
| Obese                            | -0.11 | 0.14 | 0.429  |                |
| Type 2 diabetes                  | -0.21 | 0.12 | 0.089  |                |
| Intercept                        | 0.67  | 0.06 | <0.001 |                |

For regression analyses, the healthy weight group is used as the reference. Each model includes group and LBMI Z-score as main effects and a group by LBMI Z-score interaction term to assess whether group differences vary across the distribution of LBMI Z-score.

## **FIGURE LEGENDS**

**Supplemental Figure S1.** BMC Z-scores relative to age and time since diagnosis (years) in youth with type 2 diabetes. The regression line and corresponding 95% confidence interval (gray shaded areas) is displayed. Larger point size represents a longer amount of time since diagnosis of type 2 diabetes. BMC, bone mineral content.

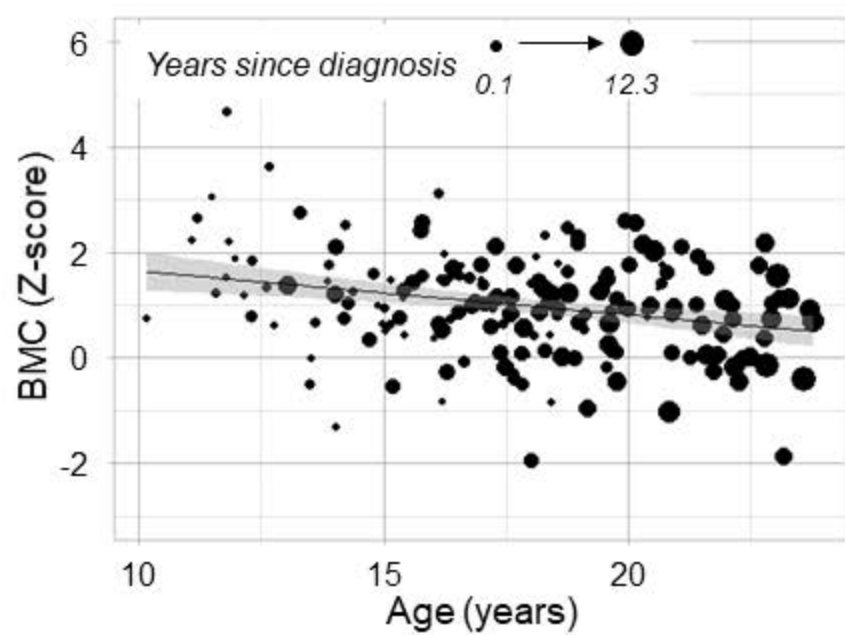

Supplement: Supplementary file 1 [file 23911379]
